# Supplementary material for: The Impact of Transport Exclusion on the Local Development of Biała County
Source: MDPI journal article supplement (doi:10.3390/su14095674), 2022-05-08
Supplement: s1 [file s1]

## **Transport exclusion in the Biała Podlaska powiat**

Dear Sir or Madam,

We invite you to fill in the questionnaire on the issue of transport exclusion in the Biała Podlaska powiat. The obtained results will be used to carry out a research project on transport in the Biała Podlaska powiat. The questionnaire is voluntary and anonymous.

The survey questionnaire is intended for people who live in the Biała Podlaska powiat.

Thank you for filling in the questionnaire.

### **1. How often do use use public means of transport?**

- ☐ Very often (Everyday / several times a week)
- ☐ Often (once a week)
- ☐ Rarely (1-2 times a month)
- ☐ Very rarely (less than once a month)
- ☐ Never

### **2. Are you satisfied with the quality of services offered by collective transport in Biala County?**

- ☐ Definitely yes
- ☐ Yes
- ☐ Rather yes
- ☐ Hard to say
- ☐ Rather no
- ☐ No
- ☐ Definitely no

### **3. To what extend are you satisfied with the shuttling frequency of public means of transport in Biala County?**

Very Satisfied  
Satisfied  
Slightly  
Dissatisfied  
Very dissatisfied

### **4. For what purpose do you most often use public transport?**

- ☐ Commuting to school or university
- ☐ Commuting to work
- ☐ Commuting to stores
- ☐ "As a means of transport to places of recreation and entertainment"
- ☐ Commuting to office/post office/bank
- ☐ Commuting to church
- ☐ Commuting to clinic/pharmacy
- ☐ Other: .....

### **5. What factors determine the quality of public transport?**

- ☐ Too high ticket prices
- ☐ Low frequency of shuttling
- ☐ The lack of options to travel to the destination point (work, school, etc.)

- Mismatched hours of departures and arrivals of buses
- Low travel comfort
- The fear of Covid-19 or other viruses
- Other: .....

**6. Have you considered changing your place of residence due to limited access to public transport in the Biała Podlaska poviat?\***

- Definitely yes
- Yes
- It's hard to say
- No
- Definitely no

**7. Do you have your own car?\***

- Yes
- No
- No, but in my household there is a car

**8. Please indicate to what extent you agree with the following statements**

| Sentences                                                                                                                  | I definitely agree | I agree | It's hard to say | I disagree | I strongly disagree |
|----------------------------------------------------------------------------------------------------------------------------|--------------------|---------|------------------|------------|---------------------|
| The poor availability of public transport makes it difficult for me to find a job.                                         |                    |         |                  |            |                     |
| Highly developed public transport contributes to the development of the local region.                                      |                    |         |                  |            |                     |
| The low availability of public transport makes it difficult for me to use city services.                                   |                    |         |                  |            |                     |
| I am considering a change of residence due to limited access to public transport.                                          |                    |         |                  |            |                     |
| I have a problem with getting to the capital of the poviat / voivodship due to the insufficient offer of public transport. |                    |         |                  |            |                     |

|                                                                                                |  |  |  |  |  |
|------------------------------------------------------------------------------------------------|--|--|--|--|--|
| When choosing a place of residence, I take into account the accessibility to public transport. |  |  |  |  |  |
| Access to public transport affects the quality of my life.                                     |  |  |  |  |  |

**9. What threats do you think result from low accessibility to collective transport?**

- ☐ Increased unemployment due to the inability to travel to the workplace
- ☐ Halting the development of the region
- ☐ Moving young people to other places that are more accessible by communication
- ☐ Limited access of residents to many public, cultural and entertainment services
- ☐ Difficult to move by people with disabilities or mobility limitations
- ☐ Increased congestion associated with more passenger cars on the road
- ☐ Other .....

**10. How is your opinion, could the phenomenon of transport exclusion in the Biała Podlaska powiat be counteracted? (multiple choice option)\***

- ☐ By allocating funds for the development of collective transport
- ☐ By adjusting the transport offer to the needs and expectations of local inhabitants
- ☐ By introducing free collective transport for residents
- ☐ By building more stops where residents report a need for it
- ☐ By modifying bus routes in accordance with passenger suggestions (e.g. within larger workplaces, places of study, culture, and entertainment)
- ☐ By involving residents in the process of planning the commune transport policy
- ☐ By creating bus lines near the newly created housing estate
- ☐ Other .....

**11. To which localities from the Biała Podlaska powiat there are no public transport connections?**

.....

**12. On which routes in the Biała Podlaska powiat should the frequency of runs be increased?**

.....

**13. Does the number of transport connections from Mr./Mrs. town have a negative impact on the quality of Mr./Mrs. life?**

- ☐ Yes
- ☐ No
- ☐ It's hard to say

**14. How do you evaluate the offer of public transport on Saturdays, Sundays and holidays?**

- ☐ It is definitely sufficient
- ☐ It is sufficient
- ☐ It is average
- ☐ It is insufficient
- ☐ It is definitely insufficient

**15. What is the distance from your place of residence to the nearest bus stop or train station?**

- ☐ Less than 0,5 km
- ☐ From 0,5 to 1 km
- ☐ From 1 km to 1,5 km
- ☐ From 1,5 km to 2 km
- ☐ More than 2 km

**16. Due to the introduction of the epidemic in Poland, have Mr./ Mrs. noticed any limitations in the accessibility of public transport?**

- ☐ Yes
- ☐ Probably yes
- ☐ It's hard to say
- ☐ Probably no
- ☐ No

**17. Do you have any suggestions for improving the public transport system in the Biala Podlaska powiat?**

.....

**18. Sex**

- ☐ Women
- ☐ Man

**19. Please enter your age in years (numerical)**

.....

**20. Education level**

- ☐ Primary education
- ☐ Professional education
- ☐ Secondary education
- ☐ Higher professional education
- ☐ Higher education

**21. Professional status**

- ☐ Unemployed
- ☐ Pensioner
- ☐ Working
- ☐ Pensioner
- ☐ Farmer
- ☐ The student
- ☐ Student

**22. In which commune/city Mr./Mrs. do you live?**

- ☐ Commune of Biała Podlaska
- ☐ Commune of Drelów
- ☐ Commune of Janów Podlaski
- ☐ Commune of Kodeń
- ☐ Commune of Konstantynów
- ☐ Commune of Leśna Podlaska
- ☐ Commune of Łomazy
- ☐ Commune of Międzyrzec Podlaski
- ☐ The city of Międzyrzec Podlaski
- ☐ Commune of Piszczac
- ☐ Commune of Rokitno
- ☐ Commune of Rossosz
- ☐ Commune of Sławatycze
- ☐ Commune of Sosnówka
- ☐ Commune of Terespol
- ☐ The city of Terespol
- ☐ Commune of Tuczna
- ☐ Commune of Wisznice
- ☐ Commune of Zalesie
